# Supplementary material for: Analysis of Hydrogeochemical Processes Regulating Groundwater Quality in a Tropical Agricultural Landscape of Northwestern Mexico
Source: Research Square preprint supplement (doi:10.21203/rs.3.rs-8629843/v1), 2026-02-12
Supplement: Supplementary file 1 [file 56daf01c3b72b5f53e729ee5.docx]

**SUPPLEMENTARY MATERIAL**

**Table S1**. Location of the sampling points of the Mocorito River aquifer

| **SP** | **Longitude** | **Latitude** |
| --- | --- | --- |
| 1 | -107.97163 | 25.46517 |
| 2 | -108.13171 | 25.43721 |
| 3 | -108.19576 | 25.29359 |
| 4 | -108.1502 | 25.36881 |
| 5 | -108.13493 | 25.37833 |
| 6 | -108.15846 | 25.31937 |
| 7 | -108.161147 | 25.365346 |

**Table S2.** Statistical analysis of the water quality parameters of the Mocorito River aquifer

| **Parameters** | **Units** | **n** | **Average** | **Standard Deviation** | **Coefficient of Variation** | **Minimum** | **Maximum** | **Range** | **Standardized Skewness** | **Standardized Kurtosis** |
| --- | --- | --- | --- | --- | --- | --- | --- | --- | --- | --- |
| Ammonia | mg/L | 64 | 0.0406 | 0.03176 | 78.27% | 0.0035 | 0.1415 | 0.138 | 4.37441 | 2.9701 |
| Nitrite | mg/L | 64 | 0.0133 | 0.01206 | 90.92% | 0.005 | 0.0472 | 0.0422 | 4.27928 | 0.8332 |
| Nitrate | mg/L | 64 | 9.6364 | 6.04797 | 62.76% | 0.031 | 32.555 | 32.524 | 3.51046 | 3.4669 |
| Organic nitrogen | mg/L | 64 | 0.1955 | 0.20183 | 103.26% | 0 | 0.7529 | 0.7529 | 3.7454 | 1.0015 |
| Total nitrogen | mg/L | 64 | 9.7084 | 5.97226 | 61.52% | 0.1357 | 33.137 | 33.0013 | 3.97683 | 4.3785 |
| Total phosphorus | mg/L | 64 | 0.1078 | 0.08178 | 75.85% | 0.0159 | 0.6245 | 0.6086 | 14.0452 | 41.5784 |
| Phosphate | mg/L | 64 | 0.3044 | 0.15007 | 49.30% | 0.0487 | 0.8996 | 0.8509 | 4.25439 | 6.2019 |
| Total chlorides | mg/L | 64 | 25.9939 | 19.3222 | 74.33% | 10 | 111.051 | 101.051 | 7.74564 | 10.5359 |
| Fecal coliforms | MPN/100mL | 64 | 498.1410 | 3039.92 | 610.25% | 1 | 24196 | 24195 | 25.3668 | 100.163 |
| Total organic carbon | mg/L | 64 | 1.2247 | 1.42014 | 115.96% | 0.103 | 8.191 | 8.088 | 11.0587 | 21.0205 |
| Total dissolved solids | mg/L | 64 | 1007.9800 | 682.574 | 67.72% | 392 | 3484 | 3092 | 6.56211 | 6.1963 |
| Hydrogen potential | UpH | 64 | 7.6063 | 0.35405 | 4.65% | 7 | 8.3 | 1.3 | 0.216913 | -1.1034 |
| Total fluorides | mg/L | 64 | 0.3344 | 0.12573 | 37.60% | 0.036 | 0.626 | 0.59 | 0.40266 | -0.2774 |
| Silica | mg/L | 64 | 55.1973 | 12.0278 | 21.79% | 31.18 | 89.68 | 58.5 | 2.53105 | 0.79286 |
| Electrical conductivity | ms/cm2 | 64 | 1606.3500 | 1153.59 | 71.81% | 596 | 7300 | 6704 | 9.28358 | 16.2822 |
| Total hardness | mg/L | 64 | 488.1640 | 353.824 | 72.48% | 144.955 | 1930 | 1785.05 | 7.3854 | 8.6428 |
| Total alkalinity | mg/L | 64 | 379.2420 | 95.7447 | 25.25% | 136.62 | 634.38 | 497.76 | 1.76512 | 0.2785 |
| Redox potential | mV | 64 | 206.2530 | 116.659 | 56.56% | 55.1 | 618.5 | 563.4 | 5.73675 | 5.7673 |
| Sulfates | mg/L | 63 | 165.5760 | 171.425 | 103.53% | 16.968 | 854.461 | 837.493 | 6.06584 | 5.8869 |
| Calcium | mg/L | 62 | 126.9780 | 104.27 | 82.12% | 40.44 | 589 | 548.56 | 7.52811 | 10.1322 |
| Magnesium | mg/L | 62 | 46.2526 | 31.7464 | 68.64% | 12.61 | 157.5 | 144.89 | 6.00394 | 5.0240 |
| Potassium | mg/L | 63 | 4.2349 | 4.46054 | 105.33% | 0.409 | 31.37 | 30.961 | 13.2081 | 35.8945 |
| Sodium | mg/L | 64 | 181.6450 | 142.519 | 78.46% | 17.18 | 630.4 | 613.22 | 5.50145 | 3.9791 |
| Bicarbonate | mg/L | 64 | 379.7580 | 94.4307 | 24.87% | 136.62 | 634.38 | 497.76 | 1.8701 | 0.4956 |
| Water temperature | °C | 64 | 28.1945 | 1.30214 | 4.62% | 24.9 | 31.7 | 6.8 | -0.126347 | 0.6470 |

**Table S3.** ANOVA results for water quality parameters from the seven sampling points from the Mocorito River aquifer*.

| **Parameter** | **Source** | **Sum of Squares** | **df** | **Mean Square** | **F-ratio** | **P-value** | **Significance (α=0.05)** |
| --- | --- | --- | --- | --- | --- | --- | --- |
| NH3 (Ammoniacal Nitrogen, mg/L) | Between Groups | 0.019074 | 6 | 0.003179 | 4.07 | 0.0018 | Significant |
|  | Within Groups | 0.044504 | 57 | 0.000781 |  |  |  |
|  | Total (Corrected) | 0.063578 | 63 |  |  |  |  |
| NO2 (Nitrites, mg/L) | Between Groups | 0.004594 | 6 | 0.000766 | 9.53 | 0.0000 | Significant |
|  | Within Groups | 0.004580 | 57 | 0.000080 |  |  |  |
|  | Total (Corrected) | 0.009175 | 63 |  |  |  |  |
| NO3 (Nitrates, mg/L) | Between Groups | 1566.29 | 6 | 261.048 | 20.16 | 0.0000 | Significant |
|  | Within Groups | 738.121 | 57 | 12.950 |  |  |  |
|  | Total (Corrected) | 2304.41 | 63 |  |  |  |  |
| ON (Organic Nitrogen, mg/L) | Between Groups | 0.947957 | 6 | 0.157993 | 5.56 | 0.0001 | Significant |
|  | Within Groups | 1.61852 | 57 | 0.028395 |  |  |  |
|  | Total (Corrected) | 2.56647 | 63 |  |  |  |  |
| TN (Total Nitrogen, mg/L) | Between Groups | 1550.57 | 6 | 258.428 | 21.15 | 0.0000 | Significant |
|  | Within Groups | 696.511 | 57 | 12.220 |  |  |  |
|  | Total (Corrected) | 2247.08 | 63 |  |  |  |  |
| TP (Total Phosphorus, mg/L) | Between Groups | 0.037161 | 6 | 0.006194 | 0.92 | 0.4883 | Not Significant |
|  | Within Groups | 0.38423 | 57 | 0.006741 |  |  |  |
|  | Total (Corrected) | 0.421391 | 63 |  |  |  |  |
| PO4 (Phosphates, mg/L) | Between Groups | 0.505632 | 6 | 0.084272 | 5.26 | 0.0002 | Significant |
|  | Within Groups | 0.913234 | 57 | 0.016022 |  |  |  |
|  | Total (Corrected) | 1.41887 | 63 |  |  |  |  |
| TCl (Total Chlorides, mg/L) | Between Groups | 7531.44 | 6 | 1255.24 | 4.47 | 0.0009 | Significant |
|  | Within Groups | 15989.5 | 57 | 280.517 |  |  |  |
|  | Total (Corrected) | 23520.9 | 63 |  |  |  |  |
| FC (Fecal Coliforms, MPN/100mL) | Between Groups | 7.072E7 | 6 | 1.179E7 | 1.31 | 0.2661 | Not Significant |
|  | Within Groups | 5.115E8 | 57 | 8.973E6 |  |  |  |
|  | Total (Corrected) | 5.822E8 | 63 |  |  |  |  |
| TOC (Total Organic Carbon, mg/L) | Between Groups | 24.8542 | 6 | 4.14236 | 2.31 | 0.0458 | Significant |
|  | Within Groups | 102.204 | 57 | 1.79306 |  |  |  |
|  | Total (Corrected) | 127.058 | 63 |  |  |  |  |
| TDS (Total Dissolved Solids, mg/L) | Between Groups | 2.52606E7 | 6 | 4.2101E6 | 58.65 | 0.0000 | Significant |
|  | Within Groups | 4.09161E6 | 57 | 71782.7 |  |  |  |
|  | Total (Corrected) | 2.93522E7 | 63 |  |  |  |  |
| pH (UpH) | Between Groups | 0.9304 | 6 | 0.155067 | 1.27 | 0.2863 | Not Significant |
|  | Within Groups | 6.9671 | 57 | 0.12223 |  |  |  |
|  | Total (Corrected) | 7.8975 | 63 |  |  |  |  |
| TF (Total Fluorides, mg/L) | Between Groups | 0.618677 | 6 | 0.103113 | 15.58 | 0.0000 | Significant |
|  | Within Groups | 0.377306 | 57 | 0.006619 |  |  |  |
|  | Total (Corrected) | 0.995984 | 63 |  |  |  |  |
| SiO2 (mg/L) | Between Groups | 4433.89 | 6 | 738.981 | 9.00 | 0.0000 | Significant |
|  | Within Groups | 4680.19 | 57 | 82.109 |  |  |  |
|  | Total (Corrected) | 9114.07 | 63 |  |  |  |  |
| EC (Electrical Conductivity, ms/cm²) | Between Groups | 5.92689E7 | 6 | 9.87816E6 | 22.92 | 0.0000 | Significant |
|  | Within Groups | 2.45693E7 | 57 | 431040 |  |  |  |
|  | Total (Corrected) | 8.38382E7 | 63 |  |  |  |  |
| TH (Total Hardness, mg/L) | Between Groups | 6.22936E6 | 6 | 1.03823E6 | 35.70 | 0.0000 | Significant |
|  | Within Groups | 1.65769E6 | 57 | 29082.3 |  |  |  |
|  | Total (Corrected) | 7.88705E6 | 63 |  |  |  |  |
| TA (Total Alkalinity, mg/L) | Between Groups | 491026 | 6 | 81837.6 | 53.93 | 0.0000 | Significant |
|  | Within Groups | 86498.6 | 57 | 1517.52 |  |  |  |
|  | Total (Corrected) | 577524 | 63 |  |  |  |  |
| SO4 (Sulfates, mg/L) | Between Groups | 1.44423E6 | 6 | 240705 | 42.06 | 0.0000 | Significant |
|  | Within Groups | 297570 | 52 | 5722.5 |  |  |  |
|  | Total (Corrected) | 1.7418E6 | 58 |  |  |  |  |
| Ca (mg/L) | Between Groups | 487021 | 6 | 81170.2 | 27.15 | 0.0000 | Significant |
|  | Within Groups | 152480 | 51 | 2989.8 |  |  |  |
|  | Total (Corrected) | 639501 | 57 |  |  |  |  |
| Mg (mg/L) | Between Groups | 47419.6 | 6 | 7903.27 | 35.65 | 0.0000 | Significant |
|  | Within Groups | 11306.1 | 51 | 221.687 |  |  |  |
|  | Total (Corrected) | 58725.7 | 57 |  |  |  |  |
| K (mg/L) | Between Groups | 184.483 | 6 | 30.747 | 9.06 | 0.0000 | Significant |
|  | Within Groups | 166.233 | 49 | 3.3925 |  |  |  |
|  | Total (Corrected) | 350.715 | 55 |  |  |  |  |
| Na (mg/L) | Between Groups | 697232 | 6 | 116205 | 12.05 | 0.0000 | Significant |
|  | Within Groups | 540062 | 56 | 9643.97 |  |  |  |
|  | Total (Corrected) | 1.23729E6 | 62 |  |  |  |  |
| HCO3 (mg/L) | Between Groups | 463024 | 6 | 77170.7 | 44.54 | 0.0000 | Significant |
|  | Within Groups | 98756.1 | 57 | 1732.56 |  |  |  |
|  | Total (Corrected) | 561780 | 63 |  |  |  |  |
| WT (Water Temperature, °C) | Between Groups | 10.2504 | 6 | 1.7084 | 1.01 | 0.4290 | Not Significant |
|  | Within Groups | 96.5702 | 57 | 1.69421 |  |  |  |
|  | Total (Corrected) | 106.821 | 63 |  |  |  |  |

* The ANOVA results indicate that several water quality parameters exhibited statistically significant differences among the groups studied (p < 0.05) among the 7 sampling sites. Specifically, ammoniacal nitrogen (NH3), nitrites (NO2), nitrates (NO3), organic nitrogen (ON), total nitrogen (TN), phosphates (PO4), total chlorides (TCl), total organic carbon (TOC), total dissolved solids (TDS), total fluorides (TF), silica (SiO2), electrical conductivity (EC), total hardness (TH), total alkalinity (TA), sulfates (SO4), calcium (Ca), magnesium (Mg), potassium (K), sodium (Na), and bicarbonates (HCO3) all showed significant differences across the groups, suggesting variation in nutrient, ionic, and general water quality characteristics. In contrast, total phosphorus (TP), fecal coliforms (FC), pH, and water temperature (WT) did not show statistically significant differences (p > 0.05), indicating relative stability of these parameters across the sampling groups. These results suggest that nutrient and ionic content are more variable and responsive to group-related factors than indicators of microbial contamination, pH, or thermal conditions. Overall, the findings highlight the importance of monitoring nitrogen, phosphorus, and key ions for understanding water quality variability, while parameters such as TP, FC, pH, and WT may remain relatively constant under similar environmental conditions.

**Table S4.** ANOVA results for water quality parameters from the two sampling periods (rainy and dry seasons) in the Mocorito River aquifer.*

| **Parameter** | **Source** | **Sum of Squares** | **df** | **Mean Square** | **F-ratio** | **P-value** | **Significance (α=0.05)** |
| --- | --- | --- | --- | --- | --- | --- | --- |
| Fecal Coliforms (MPN/100 mL) | Between Groups | 6.48793×10⁶ | 1 | 6.48793×10⁶ | 0.69 | 0.4082 | Not Significant |
| Within Groups | 5.7053×10⁸ | 61 | 9.35295×10⁶ |  |  |  |
| Total (Corrected) | 5.77018×10⁸ | 62 |  |  |  |  |
| Total Organic Carbon (mg/L) | Between Groups | 1.13709 | 1 | 1.13709 | 0.58 | 0.4491 | Not Significant |
| Within Groups | 97.695 | 50 | 1.9539 |  |  |  |
| Total (Corrected) | 98.8321 | 51 |  |  |  |  |
| Ammoniacal Nitrogen (mg/L) | Between Groups | 0.00254341 | 1 | 0.00254341 | 2.45 | 0.1227 | Not Significant |
| Within Groups | 0.0622566 | 60 | 0.00103761 |  |  |  |
| Total (Corrected) | 0.0648 | 61 |  |  |  |  |
| Nitrites (mg/L) | Between Groups | 0.000225538 | 1 | 0.000225538 | 1.96 | 0.1662 | Not Significant |
| Within Groups | 0.00700621 | 61 | 0.000114856 |  |  |  |
| Total (Corrected) | 0.00723175 | 62 |  |  |  |  |
| Nitrates (mg/L) | Between Groups | 1.12252 | 1 | 1.12252 | 0.03 | 0.8618 | Not Significant |
| Within Groups | 2202.13 | 60 | 36.7022 |  |  |  |
| Total (Corrected) | 2203.25 | 61 |  |  |  |  |
| Organic Nitrogen (mg/L) | Between Groups | 0.0043875 | 1 | 0.0043875 | 0.11 | 0.7466 | Not Significant |
| Within Groups | 2.53945 | 61 | 0.0416304 |  |  |  |
| Total (Corrected) | 2.54384 | 62 |  |  |  |  |
| Total Nitrogen (mg/L) | Between Groups | 0.00012 | 1 | 0.00012 | 0.00 | 0.9986 | Not Significant |
| Within Groups | 2132.51 | 58 | 36.7675 |  |  |  |
| Total (Corrected) | 2132.51 | 59 |  |  |  |  |
| Total Phosphorus (mg/L) | Between Groups | 0.0112373 | 1 | 0.0112373 | 1.69 | 0.1983 | Not Significant |
| Within Groups | 0.405252 | 61 | 0.00664347 |  |  |  |
| Total (Corrected) | 0.416489 | 62 |  |  |  |  |
| Total Phosphates (mg/L) | Between Groups | 0.0296682 | 1 | 0.0296682 | 1.31 | 0.2572 | Not Significant |
| Within Groups | 1.38351 | 61 | 0.0226804 |  |  |  |
| Total (Corrected) | 1.41317 | 62 |  |  |  |  |
| Total Dissolved Solids (mg/L) | Between Groups | 2657.87 | 1 | 2657.87 | 0.01 | 0.9406 | Not Significant |
| Within Groups | 2.89801×10⁷ | 61 | 475083 |  |  |  |
| Total (Corrected) | 2.89827×10⁷ | 62 |  |  |  |  |
| pH | Between Groups | 0.00604884 | 1 | 0.00604884 | 0.05 | 0.8255 | Not Significant |
| Within Groups | 7.52389 | 61 | 0.123343 |  |  |  |
| Total (Corrected) | 7.52994 | 62 |  |  |  |  |
| Total Fluorides (mg/L) | Between Groups | 0.00382338 | 1 | 0.00382338 | 0.25 | 0.6158 | Not Significant |
| Within Groups | 0.916551 | 61 | 0.0150254 |  |  |  |
| Total (Corrected) | 0.920375 | 62 |  |  |  |  |
| Silica (mg/L) | Between Groups | 5.33489 | 1 | 5.33489 | 0.04 | 0.8483 | Not Significant |
| Within Groups | 8816.99 | 61 | 144.541 |  |  |  |
| Total (Corrected) | 8822.33 | 62 |  |  |  |  |
| Electrical Conductivity (µS/cm) | Between Groups | 294041 | 1 | 294041 | 0.22 | 0.6428 | Not Significant |
| Within Groups | 8.25809×10⁷ | 61 | 1.35379×10⁶ |  |  |  |
| Total (Corrected) | 8.2875×10⁷ | 62 |  |  |  |  |
| Total Hardness (mg/L) | Between Groups | 28255.4 | 1 | 28255.4 | 0.27 | 0.6080 | Not Significant |
| Within Groups | 6.37436×10⁶ | 60 | 106239 |  |  |  |
| Total (Corrected) | 6.40262×10⁶ | 61 |  |  |  |  |
| Total Alkalinity (mg/L) | Between Groups | 781.337 | 1 | 781.337 | 0.09 | 0.7594 | Not Significant |
| Within Groups | 503710 | 61 | 8257.53 |  |  |  |
| Total (Corrected) | 504491 | 62 |  |  |  |  |
| Water Temperature (°C) | Between Groups | 24.2419 | 1 | 24.2419 | 17.91 | 0.0001 | **Significant** |
| Within Groups | 82.5574 | 61 | 1.3534 |  |  |  |
| Total (Corrected) | 106.799 | 62 |  |  |  |  |
| Sulfates (mg/L) | Between Groups | 1690.86 | 1 | 1690.86 | 0.05 | 0.8162 | Not Significant |
| Within Groups | 1.70541×10⁶ | 55 | 31007.4 |  |  |  |
| Total (Corrected) | 1.7071×10⁶ | 56 |  |  |  |  |
| Calcium (mg/L) | Between Groups | 9482.79 | 1 | 9482.79 | 0.83 | 0.3674 | Not Significant |
| Within Groups | 619813 | 54 | 11478.0 |  |  |  |
| Total (Corrected) | 629296 | 55 |  |  |  |  |
| Magnesium (mg/L) | Between Groups | 142.486 | 1 | 142.486 | 0.14 | 0.7147 | Not Significant |
| Within Groups | 56972.8 | 54 | 1055.05 |  |  |  |
| Total (Corrected) | 57115.3 | 55 |  |  |  |  |
| Potassium (mg/L) | Between Groups | 0.332374 | 1 | 0.332374 | 0.05 | 0.8220 | Not Significant |
| Within Groups | 337.874 | 52 | 6.49759 |  |  |  |
| Total (Corrected) | 338.207 | 53 |  |  |  |  |
| Sodium (mg/L) | Between Groups | 8762.29 | 1 | 8762.29 | 0.41 | 0.5238 | Not Significant |
| Within Groups | 1.17057×10⁶ | 55 | 21283.1 |  |  |  |
| Total (Corrected) | 1.17933×10⁶ | 56 |  |  |  |  |
| Bicarbonates (mg/L) | Between Groups | 367.11 | 1 | 367.11 | 0.04 | 0.8333 | Not Significant |
| Within Groups | 501356 | 61 | 8218.96 |  |  |  |
| Total (Corrected) | 501724 | 62 |  |  |  |  |

*The comparison between the rainy season (June–October) and the dry season (November–May) shows that nearly all evaluated water quality parameters exhibit no statistically significant differences (p > 0.05), indicating seasonal stability in the aquifer’s hydrochemical composition. Only water temperature displayed significant variation between periods (F = 17.91; p = 0.0001), reflecting the direct influence of climatic conditions, while all other indicators (nutrients, dissolved salts, major ions, alkalinity, hardness, coliforms, and conductivity) remained consistent across both seasons.

**Table S5**. Ionic balance error values (±%)*.

| **Site** | **Average (%)** | **Coefficient of variation (%)** |
| --- | --- | --- |
| 1 | 33.53±2.72 | 8.11 |
| 2 | 17.96±4.78 | 26.62 |
| 3 | 20.98±3.9 | 18.58 |
| 4 | 13.24±1.83 | 13.82 |
| 5 | 21.68±4.47 | 20.61 |
| 6 | 30.58±3.34 | 10.92 |
| 7 | 12.6±2.09 | 16.59 |

* The ionic balance showed that Sites 1 and 6 have high and consistent values, indicating stable conditions, while Sites 2 and 5 present moderate averages with high variability, reflecting fluctuating or heterogeneous conditions. Sites 4 and 7 have low but stable values. Overall, the combination of average values and variability highlights differences in site conditions and potential environmental influences.

**Table S6.** Pearson Correlation Matrix

| **Parameters** | **NH3** | **NO2** | **NO3** | **ON** | **TN** | **TP** | **PO4** | **TCl** | **FC** | **TOC** | **TDS** | **pH** | **TF** | **MBAS** | **SIO2** | **EC** | **TH** | **TA** | **RP** | **SO4** | **Ca** | **Mg** | **K** | **Mn** | **Na** | **HCO3** | **WT** |
| --- | --- | --- | --- | --- | --- | --- | --- | --- | --- | --- | --- | --- | --- | --- | --- | --- | --- | --- | --- | --- | --- | --- | --- | --- | --- | --- | --- |
| NH3 | 1 | 0.2387 | -0.4066 | 0.1647 | -0.3557 | 0.0167 | 0.1224 | 0.1923 | 0.3478 | -0.0215 | -0.0342 | -0.1166 | -0.2581 | 0.0555 | -0.2294 | -0.0189 | -0.0328 | -0.1738 | -0.0538 | 0.025 | 0.0316 | -0.078 | -0.0789 | -0.0103 | -0.14 | -0.1752 | -0.0789 |
| NO2 | 0.2387 | 1 | 0.2114 | 0.1398 | 0.242 | 0.0228 | 0.1558 | 0.1412 | -0.1024 | 0.3206 | 0.4817 | -0.0736 | -0.0501 | 0.0542 | -0.0552 | 0.4642 | 0.474 | 0.3695 | -0.2667 | 0.4498 | 0.3747 | 0.4829 | 0.1095 | 0.5728 | 0.3163 | 0.3708 | -0.0472 |
| NO3 | -0.4066 | 0.2114 | 1 | 0.0301 | 0.9758 | 0.1013 | 0.2294 | -0.0063 | -0.0826 | 0.2729 | 0.6203 | -0.048 | 0.351 | -0.0275 | -0.0627 | 0.6326 | 0.5515 | 0.7618 | -0.1963 | 0.5054 | 0.5272 | 0.5752 | 0.0613 | 0.5391 | 0.6421 | 0.7585 | 0.2409 |
| ON | 0.1647 | 0.1398 | 0.0301 | 1 | 0.0765 | -0.0343 | -0.0265 | 0.2889 | 0.2245 | -0.1267 | 0.4376 | -0.1021 | -0.4406 | 0.4824 | -0.1303 | 0.4407 | 0.4553 | 0.0313 | 0.2455 | 0.4566 | 0.5528 | 0.4746 | 0.0098 | 0.3464 | 0.1824 | 0.0371 | 0.1599 |
| TN | -0.3557 | 0.242 | 0.9758 | 0.0765 | 1 | 0.1073 | 0.2609 | 0.0122 | -0.0818 | 0.2655 | 0.6356 | -0.0895 | 0.3407 | 0.0074 | -0.0789 | 0.6565 | 0.5655 | 0.7721 | -0.1883 | 0.5171 | 0.543 | 0.5721 | 0.0701 | 0.5476 | 0.6467 | 0.7691 | 0.2602 |
| TP | 0.0167 | 0.0228 | 0.1013 | -0.0343 | 0.1073 | 1 | 0.5402 | -0.0274 | -0.0552 | 0.2203 | 0.0584 | 0.2245 | 0.0368 | 0.0031 | -0.1358 | 0.055 | 0.0165 | 0.101 | -0.1915 | -0.0794 | -0.045 | -0.1167 | -0.1394 | -0.0241 | 0.0713 | 0.0933 | -0.0264 |
| PO4 | 0.1224 | 0.1558 | 0.2294 | -0.0265 | 0.2609 | 0.5402 | 1 | 0.0958 | -0.0651 | 0.4026 | 0.024 | 0.1418 | 0.2423 | 0.1131 | -0.1488 | 0.0282 | -0.0902 | 0.3669 | -0.1145 | -0.0215 | 0.0054 | -0.0814 | -0.1501 | 0.0389 | 0.0438 | 0.3578 | -0.0137 |
| TCl | 0.1923 | 0.1412 | -0.0063 | 0.2889 | 0.0122 | -0.0274 | 0.0958 | 1 | -0.0814 | 0.2009 | 0.2625 | -0.2738 | -0.27 | 0.2565 | -0.2184 | 0.2842 | 0.2949 | 0.1294 | 0.3581 | 0.2002 | 0.2436 | 0.2269 | 0.2201 | 0.3816 | 0.0744 | 0.1312 | -0.0623 |
| FC | 0.3478 | -0.1024 | -0.0826 | 0.2245 | -0.0818 | -0.0552 | -0.0651 | -0.0814 | 1 | -0.038 | -0.0013 | 0.1713 | -0.1732 | 0.0967 | -0.1069 | 0.0166 | 0.0198 | -0.1711 | -0.0563 | 0.1082 | 0.0693 | -0.0079 | 0.0444 | -0.0639 | -0.0616 | -0.1744 | 0.2217 |
| TOC | -0.0215 | 0.3206 | 0.2729 | -0.1267 | 0.2655 | 0.2203 | 0.4026 | 0.2009 | -0.038 | 1 | 0.2123 | -0.025 | 0.0498 | 0.1885 | -0.0889 | 0.1821 | 0.1728 | 0.3601 | -0.12 | 0.208 | 0.128 | 0.2366 | 0.2489 | 0.2919 | 0.1762 | 0.3543 | 0.0109 |
| TDS | -0.0342 | 0.4817 | 0.6203 | 0.4376 | 0.6356 | 0.0584 | 0.024 | 0.2625 | -0.0013 | 0.2123 | 1 | -0.2841 | -0.2281 | 0.0036 | -0.3435 | 0.968 | 0.9686 | 0.6058 | -0.1667 | 0.9418 | 0.9223 | 0.9328 | 0.2385 | 0.9128 | 0.6888 | 0.6148 | 0.2149 |
| pH | -0.1166 | -0.0736 | -0.048 | -0.1021 | -0.0895 | 0.2245 | 0.1418 | -0.2738 | 0.1713 | -0.025 | -0.2841 | 1 | 0.2371 | -0.0078 | 0.1277 | -0.3087 | -0.3149 | -0.088 | -0.2911 | -0.2587 | -0.2965 | -0.2871 | -0.1518 | -0.3786 | -0.064 | -0.0822 | 0.0824 |
| TF | -0.2581 | -0.0501 | 0.351 | -0.4406 | 0.3407 | 0.0368 | 0.2423 | -0.27 | -0.1732 | 0.0498 | -0.2281 | 0.2371 | 1 | -0.1657 | 0.3807 | -0.2125 | -0.3038 | 0.3928 | -0.0907 | -0.2572 | -0.2929 | -0.2119 | -0.1682 | -0.2391 | 0.1278 | 0.3813 | -0.1177 |
| MBAS | 0.0555 | 0.0542 | -0.0275 | 0.4824 | 0.0074 | 0.0031 | 0.1131 | 0.2565 | 0.0967 | 0.1885 | 0.0036 | -0.0078 | -0.1657 | 1 | 0.0322 | 0.0065 | 0.0052 | 0.021 | 0.3613 | 0.0182 | 0.0344 | 0.0823 | -0.0174 | 0.0482 | -0.0837 | 0.012 | -0.0956 |
| SIO2 | -0.2294 | -0.0552 | -0.0627 | -0.1303 | -0.0789 | -0.1358 | -0.1488 | -0.2184 | -0.1069 | -0.0889 | -0.3435 | 0.1277 | 0.3807 | 0.0322 | 1 | -0.3317 | -0.337 | -0.0457 | 0.0372 | -0.3317 | -0.2972 | -0.1874 | -0.18 | -0.3027 | -0.041 | -0.0574 | -0.0158 |
| EC | -0.0189 | 0.4642 | 0.6326 | 0.4407 | 0.6565 | 0.055 | 0.0282 | 0.2842 | 0.0166 | 0.1821 | 0.968 | -0.3087 | -0.2125 | 0.0065 | -0.3317 | 1 | 0.9623 | 0.5436 | -0.1372 | 0.8618 | 0.8687 | 0.8904 | 0.2146 | 0.9039 | 0.6142 | 0.5516 | 0.2715 |
| TH | -0.0328 | 0.474 | 0.5515 | 0.4553 | 0.5655 | 0.0165 | -0.0902 | 0.2949 | 0.0198 | 0.1728 | 0.9686 | -0.3149 | -0.3038 | 0.0052 | -0.337 | 0.9623 | 1 | 0.4808 | -0.1148 | 0.9003 | 0.8925 | 0.9078 | 0.3047 | 0.9285 | 0.5899 | 0.4899 | 0.2286 |
| TA | -0.1738 | 0.3695 | 0.7618 | 0.0313 | 0.7721 | 0.101 | 0.3669 | 0.1294 | -0.1711 | 0.3601 | 0.6058 | -0.088 | 0.3928 | 0.021 | -0.0457 | 0.5436 | 0.4808 | 1 | -0.1813 | 0.5391 | 0.5396 | 0.5713 | 0.1589 | 0.533 | 0.7037 | 0.9916 | 0.0779 |
| RP | -0.0538 | -0.2667 | -0.1963 | 0.2455 | -0.1883 | -0.1915 | -0.1145 | 0.3581 | -0.0563 | -0.12 | -0.1667 | -0.2911 | -0.0907 | 0.3613 | 0.0372 | -0.1372 | -0.1148 | -0.1813 | 1 | -0.1607 | -0.0934 | -0.0931 | -0.1199 | -0.0933 | -0.2682 | -0.2049 | -0.0532 |
| SO4 | 0.025 | 0.4498 | 0.5054 | 0.4566 | 0.5171 | -0.0794 | -0.0215 | 0.2002 | 0.1082 | 0.208 | 0.9418 | -0.2587 | -0.2572 | 0.0182 | -0.3317 | 0.8618 | 0.9003 | 0.5391 | -0.1607 | 1 | 0.9063 | 0.9232 | 0.2258 | 0.8417 | 0.6534 | 0.5494 | 0.1998 |
| Ca | 0.0316 | 0.3747 | 0.5272 | 0.5528 | 0.543 | -0.045 | 0.0054 | 0.2436 | 0.0693 | 0.128 | 0.9223 | -0.2965 | -0.2929 | 0.0344 | -0.2972 | 0.8687 | 0.8925 | 0.5396 | -0.0934 | 0.9063 | 1 | 0.8935 | 0.2462 | 0.8481 | 0.674 | 0.5474 | 0.2771 |
| Mg | -0.078 | 0.4829 | 0.5752 | 0.4746 | 0.5721 | -0.1167 | -0.0814 | 0.2269 | -0.0079 | 0.2366 | 0.9328 | -0.2871 | -0.2119 | 0.0823 | -0.1874 | 0.8904 | 0.9078 | 0.5713 | -0.0931 | 0.9232 | 0.8935 | 1 | 0.2174 | 0.8794 | 0.6542 | 0.5816 | 0.2267 |
| K | -0.0789 | 0.1095 | 0.0613 | 0.0098 | 0.0701 | -0.1394 | -0.1501 | 0.2201 | 0.0444 | 0.2489 | 0.2385 | -0.1518 | -0.1682 | -0.0174 | -0.18 | 0.2146 | 0.3047 | 0.1589 | -0.1199 | 0.2258 | 0.2462 | 0.2174 | 1 | 0.3151 | 0.1207 | 0.1578 | -0.0054 |
| Mn | -0.0103 | 0.5728 | 0.5391 | 0.3464 | 0.5476 | -0.0241 | 0.0389 | 0.3816 | -0.0639 | 0.2919 | 0.9128 | -0.3786 | -0.2391 | 0.0482 | -0.3027 | 0.9039 | 0.9285 | 0.533 | -0.0933 | 0.8417 | 0.8481 | 0.8794 | 0.3151 | 1 | 0.5874 | 0.5377 | 0.1842 |
| Na | -0.14 | 0.3163 | 0.6421 | 0.1824 | 0.6467 | 0.0713 | 0.0438 | 0.0744 | -0.0616 | 0.1762 | 0.6888 | -0.064 | 0.1278 | -0.0837 | -0.041 | 0.6142 | 0.5899 | 0.7037 | -0.2682 | 0.6534 | 0.674 | 0.6542 | 0.1207 | 0.5874 | 1 | 0.7092 | 0.1704 |
| HCO3 | -0.1752 | 0.3708 | 0.7585 | 0.0371 | 0.7691 | 0.0933 | 0.3578 | 0.1312 | -0.1744 | 0.3543 | 0.6148 | -0.0822 | 0.3813 | 0.012 | -0.0574 | 0.5516 | 0.4899 | 0.9916 | -0.2049 | 0.5494 | 0.5474 | 0.5816 | 0.1578 | 0.5377 | 0.7092 | 1 | 0.0505 |
| WT | -0.0789 | -0.0472 | 0.2409 | 0.1599 | 0.2602 | -0.0264 | -0.0137 | -0.0623 | 0.2217 | 0.0109 | 0.2149 | 0.0824 | -0.1177 | -0.0956 | -0.0158 | 0.2715 | 0.2286 | 0.0779 | -0.0532 | 0.1998 | 0.2771 | 0.2267 | -0.0054 | 0.1842 | 0.1704 | 0.0505 | 1 |

**Table S7**. Analysis of main components

| **Parameters** | **Component** | **Component** | **Component** | **Component** | **Component** | **Component** | **Component** |
| --- | --- | --- | --- | --- | --- | --- | --- |
| **1** | **2** | **3** | **4** | **5** | **6** | **7** |
| NH3 | -0.019813 | -0.227558 | 0.327639 | 0.212641 | -0.117985 | 0.37 | 0.147814 |
| NO2 | 0.163309 | -0.013292 | 0.203636 | 0.0575409 | -0.256523 | 0.476105 | 0.055039 |
| NO3 | 0.233996 | 0.274725 | -0.0927699 | -0.0308162 | 0.151082 | -0.128525 | -0.0327144 |
| ON | 0.126132 | -0.302705 | 0.0427115 | -0.00669091 | 0.426668 | 0.126978 | 0.0519693 |
| TN | 0.239256 | 0.260145 | -0.067636 | -0.0368293 | 0.162952 | -0.112424 | -0.0174976 |
| TP | 0.00974698 | 0.142696 | 0.403771 | 0.218365 | 0.0917035 | -0.315472 | 0.246231 |
| PO4 | 0.0377559 | 0.215415 | 0.522484 | 0.0358841 | 0.130574 | -0.115333 | 0.118053 |
| TCl | 0.0858943 | -0.215103 | 0.258769 | -0.336522 | -0.0345961 | -0.109227 | -0.0690676 |
| FC | -0.0100887 | -0.153204 | 0.0279051 | 0.412945 | 0.241923 | 0.152017 | -0.357134 |
| TOC | 0.101137 | 0.119276 | 0.36858 | -0.0989141 | -0.130981 | -0.0487941 | -0.441389 |
| TDS | 0.311626 | -0.0722791 | -0.0231913 | 0.053329 | -0.0173989 | -0.0331507 | 0.0841568 |
| pH | -0.0845023 | 0.19924 | 0.0643123 | 0.326898 | 0.250249 | 0.0896723 | -0.22767 |
| TF | -0.0351564 | 0.426099 | -0.0708691 | -0.133231 | 0.0468262 | 0.193171 | 0.0141201 |
| MBAS | 0.0109176 | -0.146853 | 0.257926 | -0.281015 | 0.429457 | 0.194737 | -0.248475 |
| SIO2 | -0.0940385 | 0.162981 | -0.221832 | -0.164514 | 0.146553 | 0.446239 | -0.0818449 |
| EC | 0.301401 | -0.0810292 | -0.0289516 | 0.0525123 | 0.0101579 | -0.0688815 | 0.0950828 |
| TH | 0.296492 | -0.135769 | -0.0664754 | 0.051394 | -0.0505578 | -0.0639764 | 0.0431649 |
| TA | 0.236448 | 0.272654 | 0.0777972 | -0.1356 | 0.0190895 | 0.107059 | -0.0340308 |
| RP | -0.0604772 | -0.203159 | -0.0157639 | -0.475044 | 0.291922 | -0.138123 | 0.0642528 |
| SO4 | 0.292226 | -0.108555 | -0.0515175 | 0.0821195 | -0.00981025 | 0.0617449 | 0.0153707 |
| Ca | 0.291154 | -0.125905 | -0.0664696 | 0.0589724 | 0.0593497 | -0.00123544 | 0.0528034 |
| Mg | 0.296771 | -0.0906558 | -0.101883 | -0.0214064 | 0.0236621 | 0.0924263 | -0.00189721 |
| K | 0.0869231 | -0.0833208 | -0.0259034 | -0.0646935 | -0.348617 | -0.170389 | -0.621043 |
| Mn | 0.293061 | -0.106436 | 0.0114269 | -0.0443373 | -0.123105 | -0.0116234 | 0.0143521 |
| Na | 0.242567 | 0.142512 | -0.0969302 | 0.0396085 | 0.0334982 | 0.114206 | 0.042656 |
| HCO3 | 0.238316 | 0.269467 | 0.0745899 | -0.129445 | 0.00565348 | 0.112695 | -0.0252446 |
| WT | 0.0756482 | -0.0160692 | -0.16237 | 0.297484 | 0.291919 | -0.225271 | -0.184961 |

## **Clustering Using SOM Maps**

A Self-Organizing Maps (SOM) analysis was applied to the physicochemical parameters obtained from seven sampling sites to identify patterns in groundwater quality. As noted by Hao et al (2025) and Singha et al (2025), SOM analysis reveals groupings of variables associated with common geohydrochemical processes. In this study, three main groups were distinguished (Fig 10): dissolved minerals (EC, TDS, TH), nutrients and organic matter (NH₃, NO₂, NO₃, TOC, P, fecal coliforms), and major ions (Cl⁻, SO₄²⁻, Ca²⁺, Na⁺, Mg²⁺, K⁺).

| **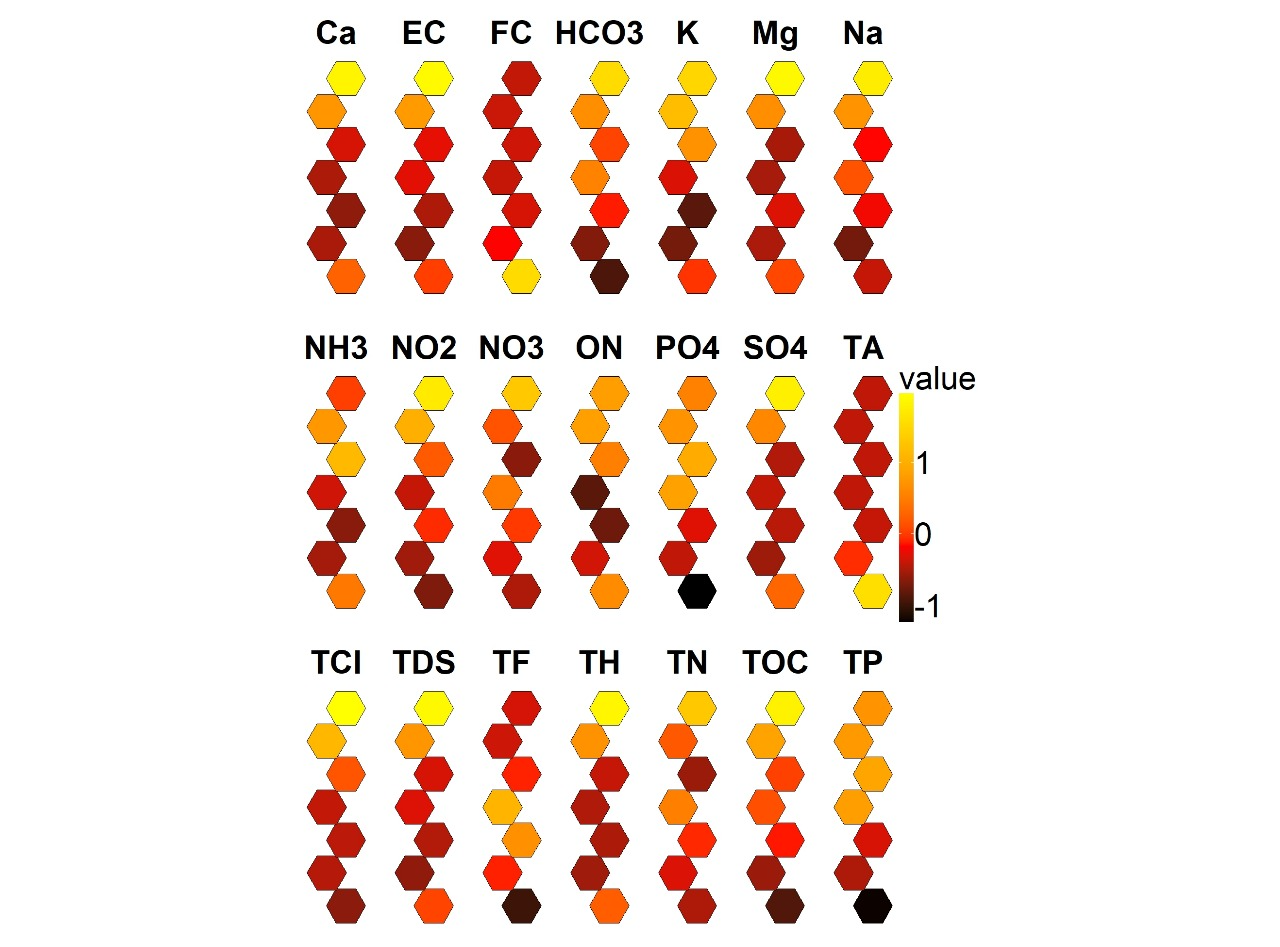** | **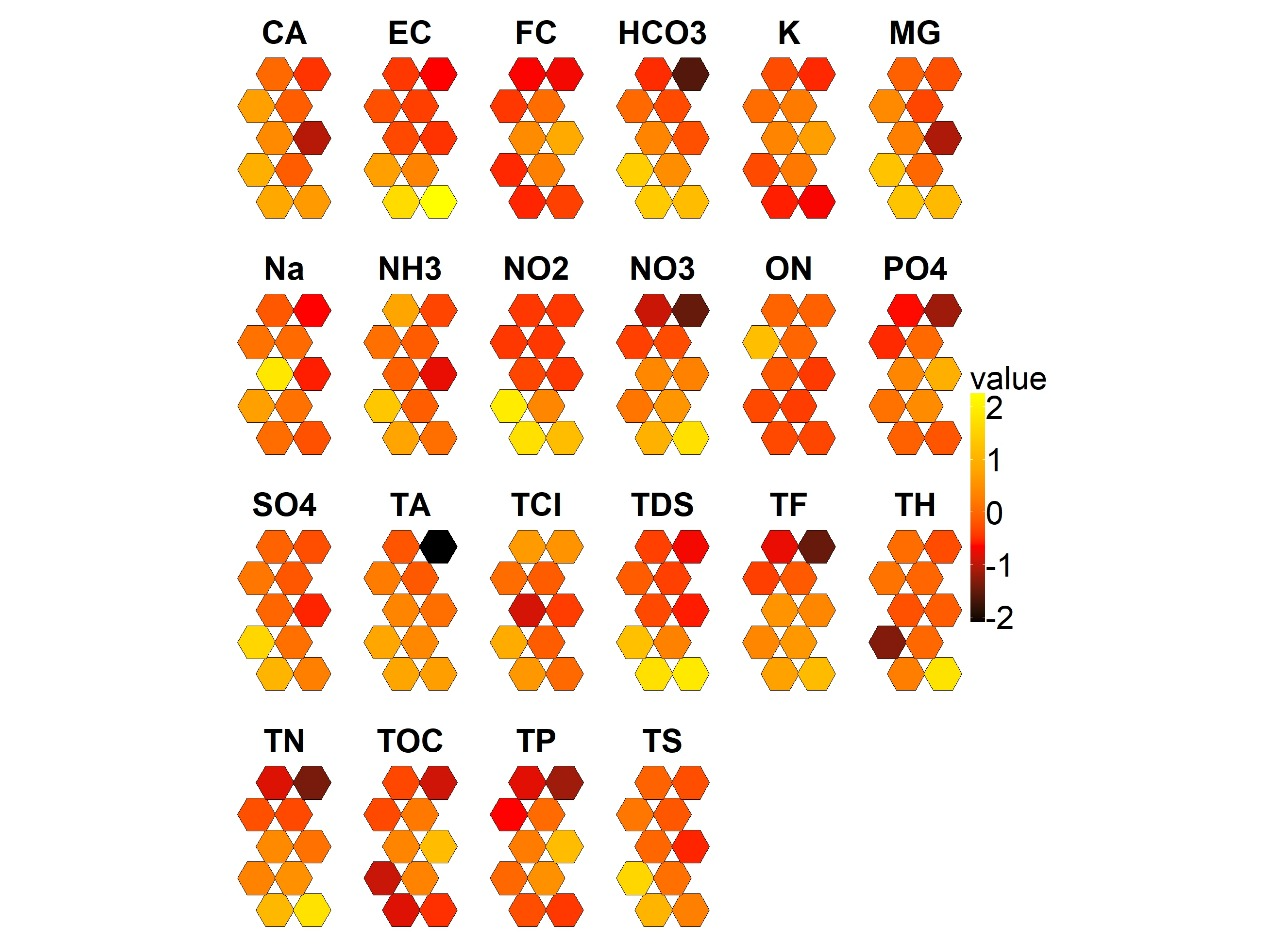** |
| --- | --- |
| (a) | (b) |

**Fig 10.** SOM matrices of groundwater sample variables from the seven sampling sites (a) and for the 2012–2022 period.

The results show that SP1 exhibited the highest mineralization, with elevated values of EC, hardness, and salts, as well as high concentrations of NO₂, NO₃, NH₃, and TOC, suggesting a high agricultural influence. Groundwater quality varied significantly between the sites. SP6 showed the best water quality and SP5 was notable for its high fecal coliform counts. In contrast, SP4 presented a mixed profile, with an accumulation of ammonium (NH4+) and organic nitrogen under more reducing conditions. SP3 and SP7 were characterized by low nutrient concentrations, reflecting lower anthropogenic pressure. SP1 registered the highest major ions concentrations, while SP3 and SP6 showed the lowest values.

Temporal analysis indicated that 2015 and 2018 were the most critical years due to high mineralization (TA, EC, TDS, TH), whereas 2013–2014 reflected better water quality. Between 2015 and 2017, high concentration of NH₃, NO₂, P, and NO₃ were observed, indicating higher agricultural pressure and reduction processes. In 2016, maximum values of SO₄²⁻, Cl⁻, Ca²⁺, Na⁺, and K⁺ were detected, confirming intense mineralization processes. The SOM analysis identified a 2- to 3-year cycle in water quality parameters, a pattern related to shifts in recharge, land use, or extreme climatic events.

Spatial and seasonal patterns indicated that the most critical sites (SP1 and SP5) coincided with the years of highest mineralization and organic load (2015–2017, 2018), reinforcing the relationship between local anthropogenic pressures and climatic conditions that favor nutrient and salt leaching. In contrast, the sites with better quality (SP6 and SP3) were associated with periods of low ionic concentrations (2013–2014), confirming the strong dependence between spatial and temporal variability in groundwater quality.

**Figures**


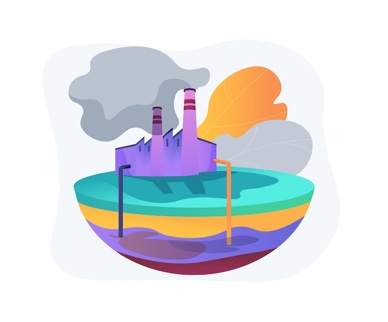


**15% Geochemical &
Biogeochemical Factors**

pH, redox conditions, organic
matter content

**10% Physical & Climatic
Factors**

Rainfall, temperature,
evapotranspiration

Land use, waste management, overextraction

**25% Anthropogenic Factors**

Aquifer type, conductivity, depth to water table

**15% Hydrogeological
Factors**

**20% Contaminant-
Specific Factors**

Solubility, density, biodegradability

Fractures, faults, karst systems

**15% Structural &
Geological Discontinuities**

**Figure S1.** Distribution of Factors Affecting Groundwater Pollution.

Fig 1S shows the spatial relationship between the average annual groundwater availability (mm³/year) and the Water Quality Index (WQI) across the different aquifers in Sinaloa. A clear gradient is observed: aquifers with high water availability (upper areas of the graph) generally exhibit better water quality values (lower WQI), whereas those with low availability tend to cluster in the poorest water quality categories (higher WQI).
